# Supplementary material for: Synthesis, Crystal Structure, and Electrochemistry of Mono- and Bis-Homoannular Ferrocene Derivatives
Source: Preprints.org preprint supplement (doi:10.20944/preprints202401.0965.v1), 2024-01-12

**Supporting information.**

**Figure S1.** 1HNMR of **3a**


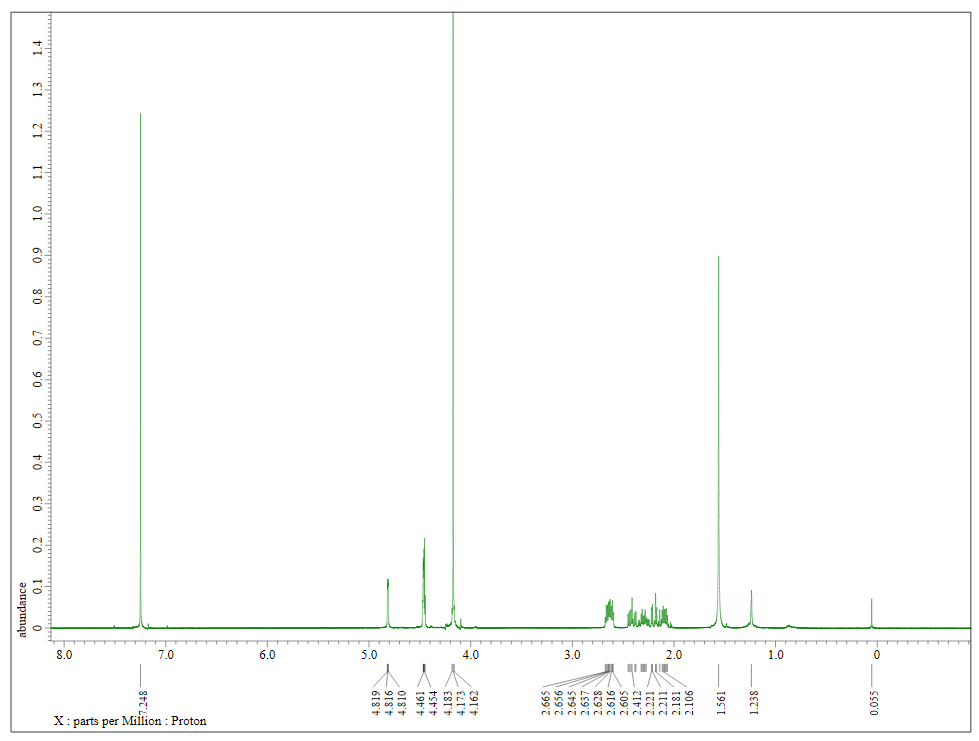


**Figure S2.** 13C NMR of **3a**


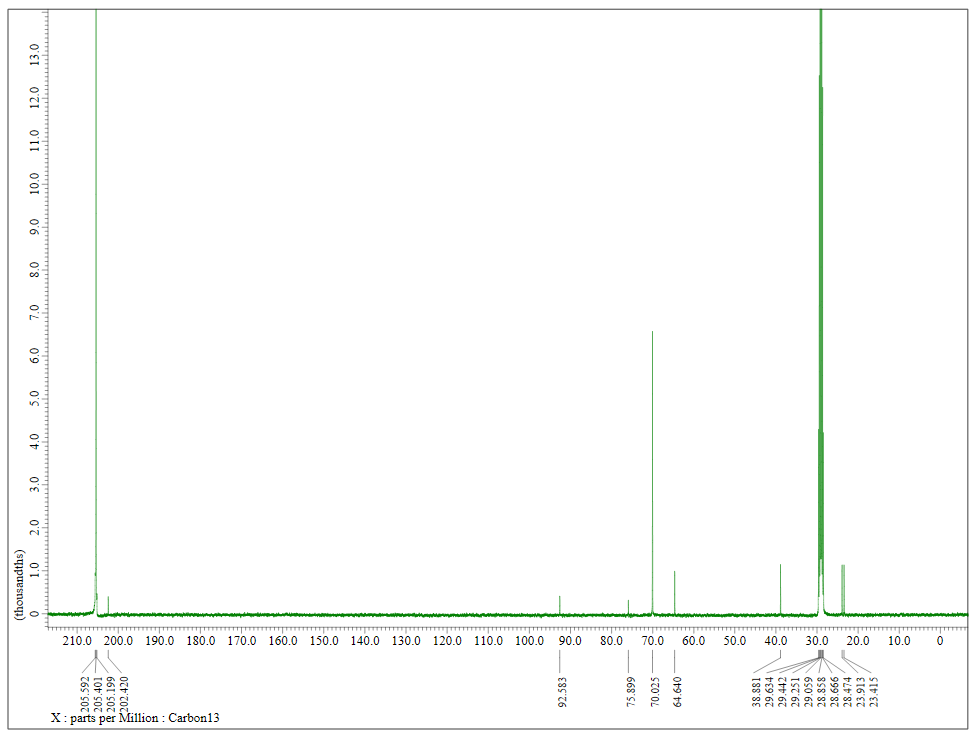


**Figure S3.** 1H NMR of **3b**


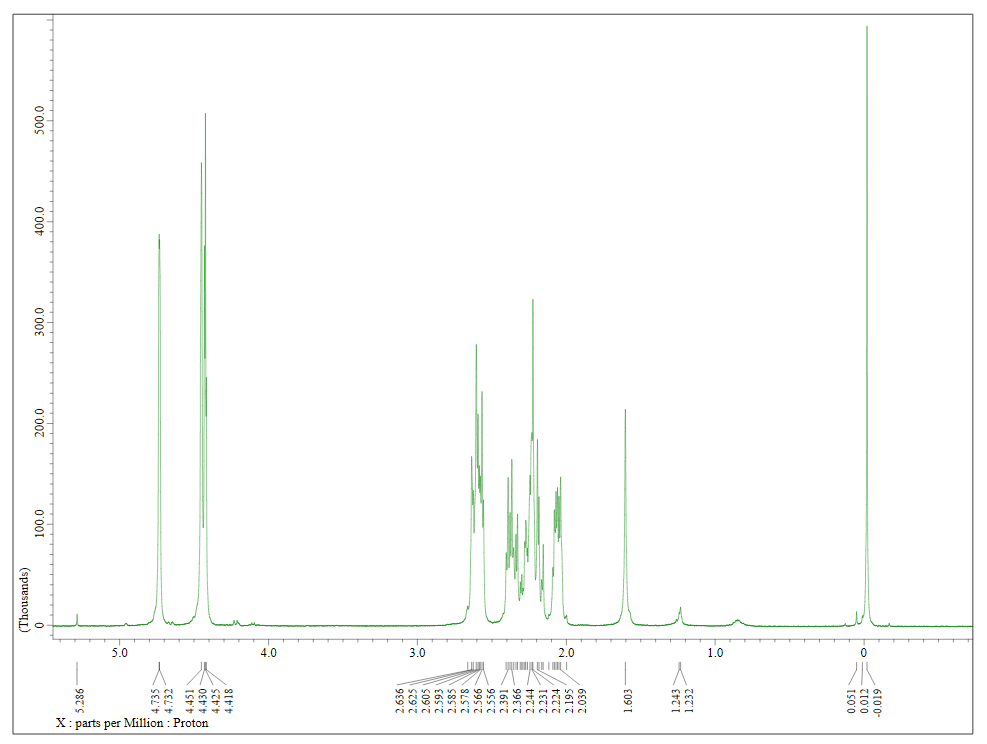


**Figure S4.** 13CNMR of **3b**


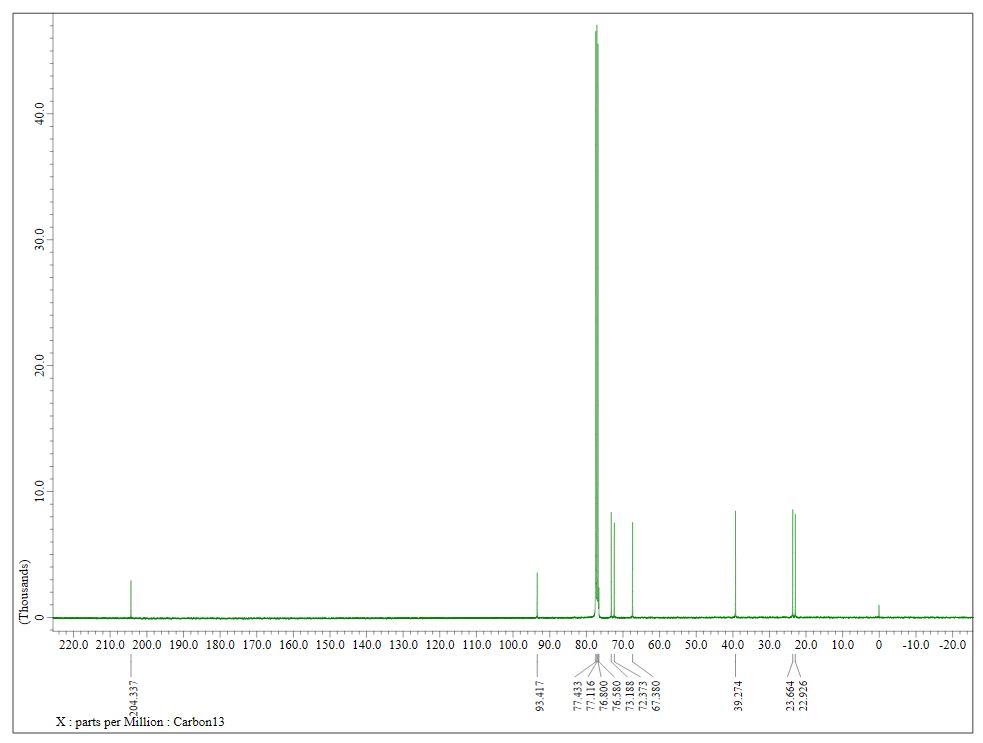


**Figure S5.** 1H NMR of **3b’**


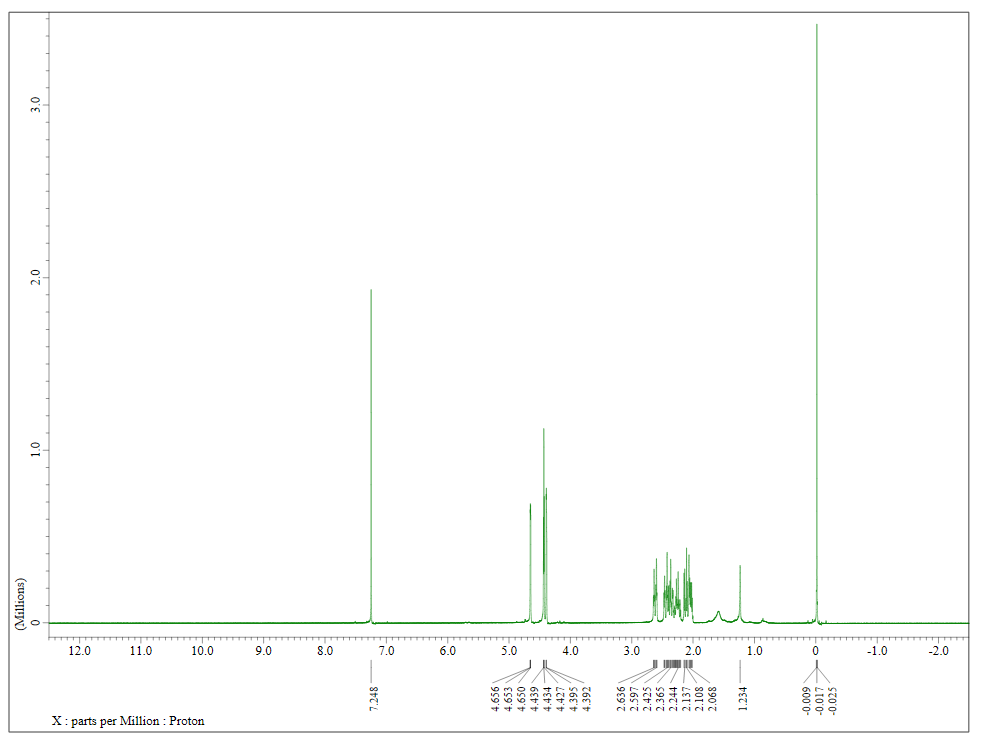


**Figure S6.** 13C NMR of **3b’**


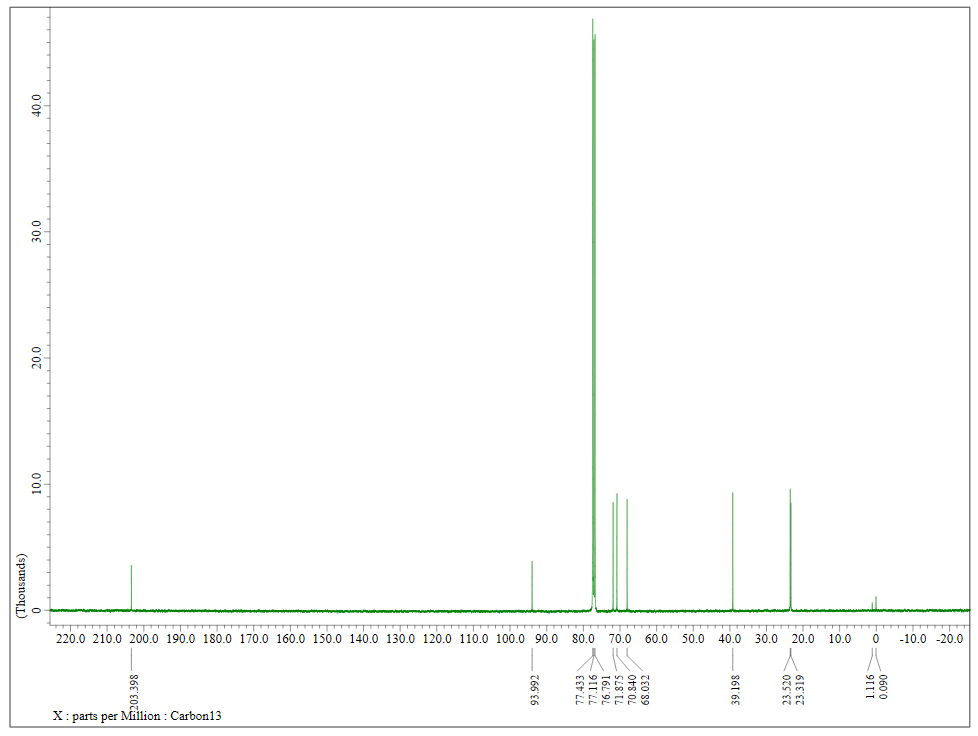


**Figure S7.** 1H NMR of **4a**


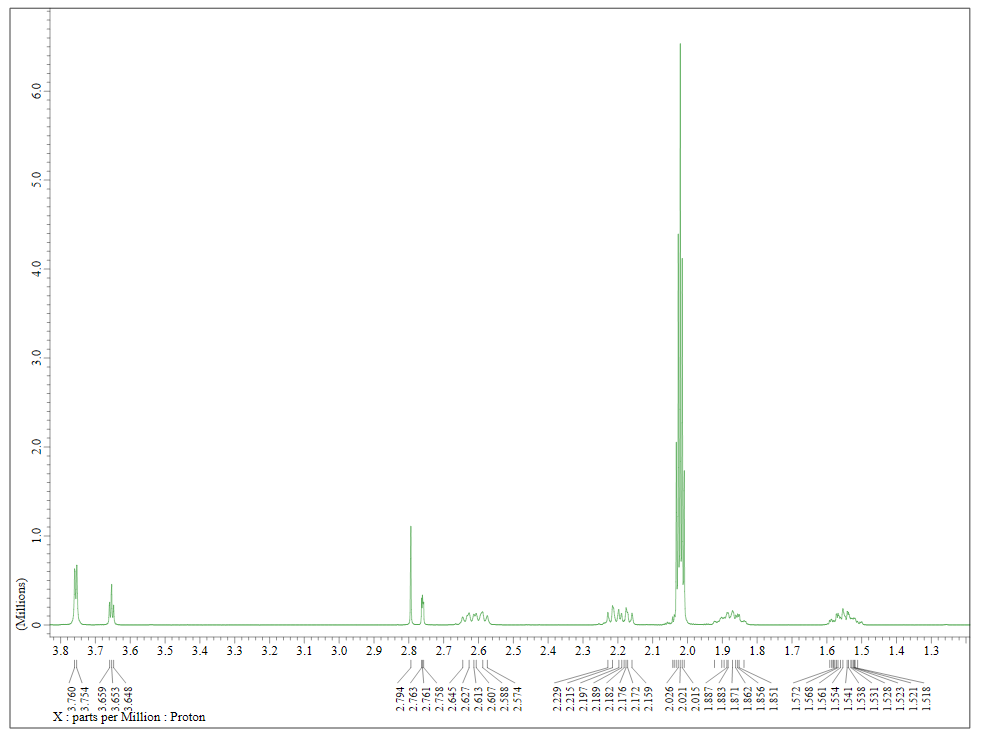


**Figure S8.** 13C NMR of **4a**


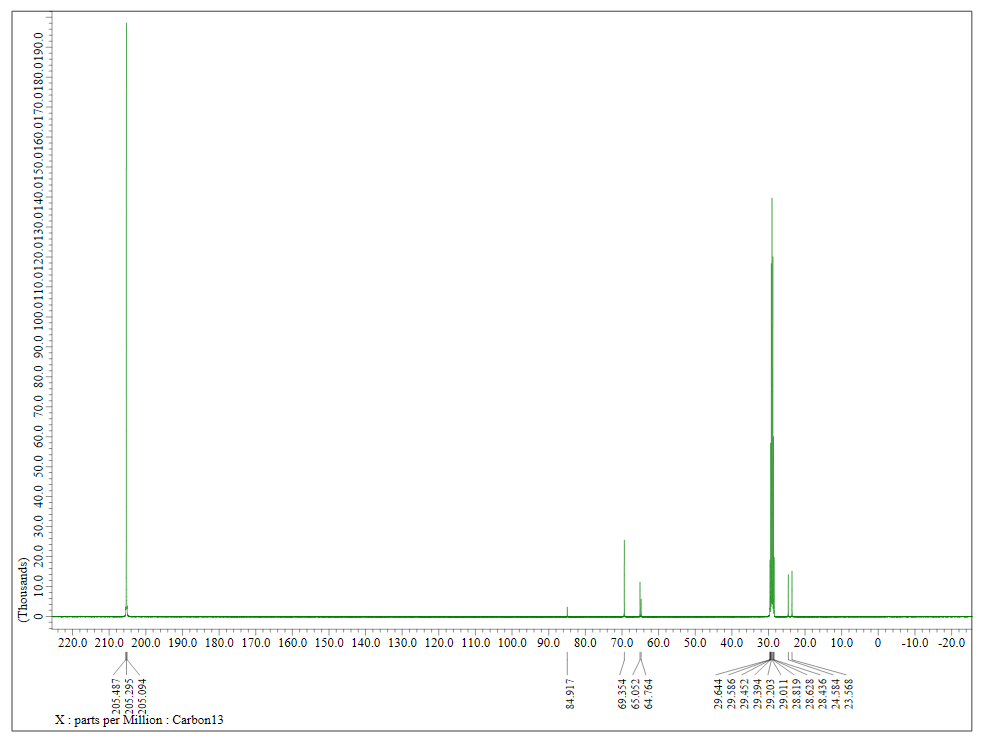


**Figure S9.** 1HNMR of **4b**


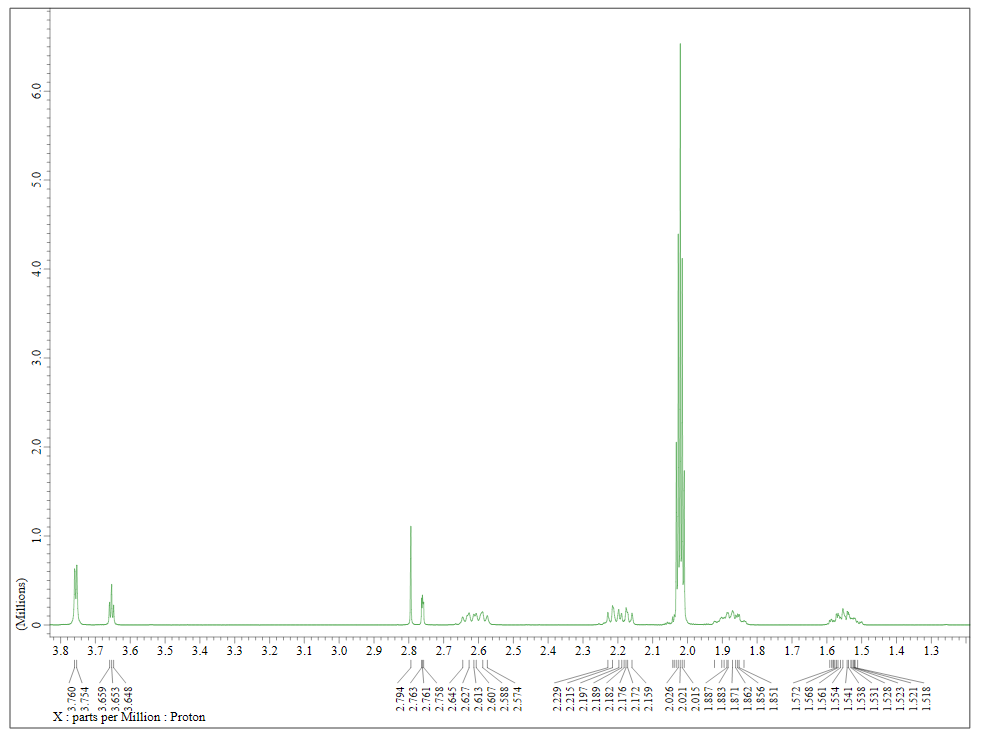

Supplement: Supplementary file 1 [file supplementary]
